# Supplementary material
Source: PubMed Central journal article supplement (PMC1544195)

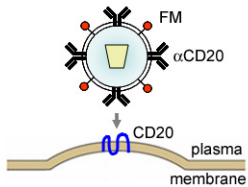

binding  
induces  
endocytosis

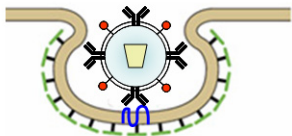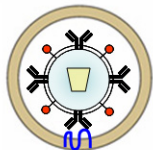

endosomal compartment  
low pH

low pH  
triggers  
conformation  
changes of FM

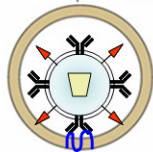

membrane fusion empties  
the capsid into cytosol

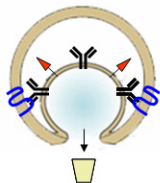

Supplement: pnas_0604993103_1.pdf [file pnas_0604993103_1.pdf]
