# Supplementary material
Source: PubMed Central journal article supplement (PMC1544195)

FUGW/ $\alpha$ CD20+SINmu    CCMV/ $\alpha$ CD20+SINmu    CPGK/ $\alpha$ CD20+SINmu

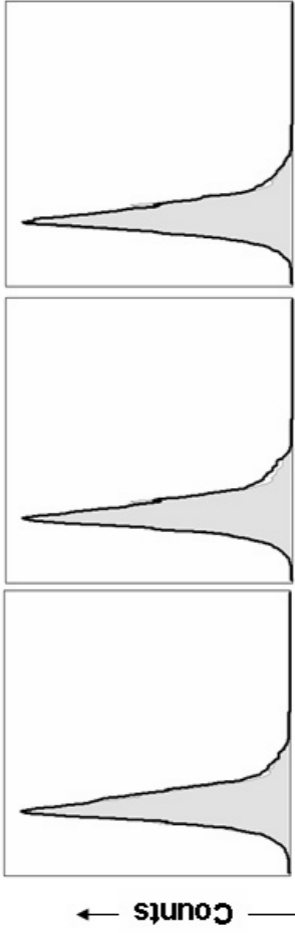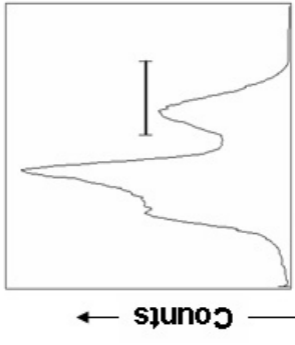

Supplement: pnas_0604993103_2.pdf [file pnas_0604993103_2.pdf]
